# Supplementary material for: Doping Gd16 nanoclusters for expanded optical properties and thermometry applications
Source: Royal Society of Chemistry journal article supplement (doi:10.1039/d4nr04779f), 2025-01-01
Supplement: d4nr04779f1.pdf [file d4nr04779f1.pdf]

## Supporting Information

### **Doping Gd<sub>16</sub> Nanoclusters for Expanded Optical Properties and Thermometry Application**

Tingting Li,<sup>a</sup> Jinyu Liu,<sup>a</sup> Feng Jiang,<sup>b</sup> Shengrong He,<sup>b</sup> Jinzhe Liu,<sup>a</sup> Weinan Dong,<sup>b</sup> Ying Zhang,<sup>\*c,d</sup> Yanan Li<sup>\*c,d</sup> and Zhennan Wu<sup>\*b</sup>

<sup>a</sup> School of Materials Science and Engineering, Jilin Jianzhu University, Changchun 130018, China.

<sup>b</sup> State Key Laboratory of Integrated Optoelectronics and College of Electronic Science and Engineering, Jilin University, Changchun 130012, China.

<sup>c</sup> Department of Pediatrics, Children's Medical Center, The First Hospital of Jilin University, Changchun 130021, China.

<sup>d</sup> Clinical Research Center for Child Health, the First Hospital of Jilin University, Changchun 130021, China.

Correspondence: [yingzhang@jlu.edu.cn](mailto:yingzhang@jlu.edu.cn); [ynli@jlu.edu.cn](mailto:ynli@jlu.edu.cn); [wuzn@jlu.edu.cn](mailto:wuzn@jlu.edu.cn)

### Experimental and theoretical intensity parameters.

The theoretical background of 4f-4f intensity theory is well established and widely used in the lanthanides, especially in trivalent europium and terbium compounds.<sup>1-4</sup>The intensities of 4f-4f transitions in Eu<sup>3+</sup> and Tb<sup>3+</sup> complexes are usually expressed in terms of the areas under the curves in their emission spectra. From these spectra, the experimental intensity parameters  $\Omega_2$ ,  $\Omega_4$ , and  $\Omega_6$  may be estimated using the following equation:<sup>5, 6</sup>

$$\frac{A_{ed}}{A_{md}} = \frac{\int I_J(v)dv}{\int I_{md}(v)dv} = \frac{e^2 v_J^3 (n^2 + 2)^2}{S_{md} v_{md}^3 9n^2} \sum_{\lambda} \Omega_{\lambda} \langle {}^7F_J \parallel U^{\lambda} \parallel {}^5D_{(0,4)} \rangle^2 (\lambda = 2, 4) \quad S1$$

where  $A_{ed}$  and  $A_{md}$  on the left of the equation are the electric dipole transition and magnetic dipole transition rate, respectively, and their ratio can be acquired by calculating the corresponding emission spectra integrated area ratio. On the right of the equation, magnetic line strength  $S_{md}$  (Eu<sup>3+</sup>) =  $7.83 \times 10^{-42} \text{ cm}^{-1}$ ,  $e = 1.6 \times 10^{-19} \text{ C}$ ,  $n$  is the refractive index of the medium ( $n \approx 1.5$  for most Eu<sup>3+</sup> samples).  $\langle {}^7F_J \parallel U^{\lambda} \parallel {}^5D_0 \rangle^2$  are equal to 0.0032, 0.0023 and 0.00023 for  $\lambda = 2, 4$  and  $6$ , respectively.

**Intramolecular Energy Transfer Rates Calculation.** The intramolecular energy transfer (IET) rates from the ligands to Ln<sup>3+</sup> ion was calculated by taking into account the dipole-dipole ( $W_{d-d}$ ), dipole-multipole ( $W_{d-m}$ ), and exchange ( $W_{ex}$ ) mechanisms on JOYSpectra web platform.<sup>7-11</sup>

$$W_{d-d} = \frac{S_L (1 - \sigma_1)^2 4\pi e^2}{(2J + 1) G \hbar R_L^6} \sum_{\lambda} \Omega_{\lambda}^{FED} \langle \Psi' J' \parallel U^{(\lambda)} \parallel \Psi J \rangle^2 F \quad S2$$

$$W_{d-m} = \frac{S_L}{(2J + 1) G} \frac{2\pi e^2}{\hbar} \sum_{\lambda} (\lambda + 1) \frac{\langle r^{\lambda} \rangle^2}{(R_L^{\lambda+2})^2} \langle f \parallel C^{(\lambda)} \parallel f \rangle^2 (1 - \sigma_{\lambda})^2 \times \langle \Psi' J' \parallel U^{(\lambda)} \parallel \Psi J \rangle^2 F$$

S3

$$W_{ex} = \frac{(1 - \sigma_0)^2 8\pi e^2}{(2J + 1) G \hbar R_L^4} \langle \Psi' J' \parallel U^{(\lambda)} \parallel \Psi J \rangle^2 \sum_m \left| \left\langle \Phi \left| \sum_j \mu_z(j) S_m(j) \right| \Phi^* \right\rangle \right|^2 F \quad S4$$

where  $RL$  is the donor-acceptor states distance,  $\Omega_{\lambda}^{FED}$  are the intensity parameters assigned exclusively with the forced electric dipole mechanism (Table S14, S15). The values of the squared reduced matrix elements  $\langle \Psi' J' \parallel U^{(\lambda)} \parallel \Psi J \rangle^2$ , which depend only on the Ln<sup>3+</sup> ion, were taken from Carnall et al.  $S_L$  is the dipole strength of the ligand transition involved in IET ( $\sim 10^{-36}$  and  $\sim 10^{-40} \text{ (esu)}^2 \cdot \text{cm}^2$  for S1 and T1, respectively), the  $\langle r^{\lambda} \rangle$  are the 4f radial integrals,  $G$  is the ligand state degeneracy ( $G = 1$  or  $3$  for S1 or T1, respectively),  $\langle f \parallel C^{(\lambda)} \parallel f \rangle$  ( $f = 3$ ) is the reduced matrix element of Racah's tensor

operators, and  $(1 - \sigma_\lambda)$  is the shielding factors that have a relation with the overlap integrals between valence orbitals of the pair Ln–X (X is the ligating atom in the first coordination sphere).<sup>12</sup>

In Eq. S4,  $S_m$  is the spin operator in the ligand and  $\mu_z$  is the dipole operator (its z-component), the value of the element matrix of these coupled operators is  $\sim 10^{-36} (esu)^2 \cdot cm^2$ .<sup>13</sup> The  $\langle \Psi' | U^{(\lambda)} | \Psi \rangle$  is the reduced matrix elements of the lanthanide spin operator, which were calculated by using free-ion wavefunctions in the intermediate coupling scheme.<sup>14</sup>

The  $F$  term in the above equations is the spectral overlap factor that considers the energy mismatch condition between donor and acceptor states. For the case of ligand-to-Ln<sup>3+</sup> energy transfer,  $F$  can be estimated by Eq. S5:

$$F = \frac{1}{\hbar\gamma_L} \sqrt{\frac{\ln(2)}{\pi}} e^{-\left(\frac{\Delta}{\hbar\gamma_L}\right)^2 \ln^2(2)} \quad S5$$

where  $\Delta$  is the energy difference between the donor state and the lanthanide ion acceptor state,  $\Delta = E_{lig} - E_{Ln}$ . The  $\gamma L$  is the bandwidth at half-height of the donor states (S1 and T1), which is assumed here to have a typical value of  $\gamma L = 3000 \text{ cm}^{-1}$  for both S1 and T1 states.<sup>15</sup>

The forward energy transfer rates ( $W$ ) involving the Ln<sup>3+</sup> ions as acceptors are calculated by the sum over Eq. S2, S3, and S4 in the same pathway:

$$W = W_{d-d} + W_{d-m} + W_{ex} \quad S6$$

$W$  must be multiplied by the barrier factor  $\exp(-|\Delta|/k_B T)$  only if  $\Delta$  is negative, where  $k_B$  is the Boltzmann constant and T is the temperature. The same expressions and considerations are used to calculate the backward IET rates  $W_b$  (the energy transfer rates from the Ln<sup>3+</sup> ion to the ligand states). The calculated values of forward and backward IET rates are given in Table S3-S10.

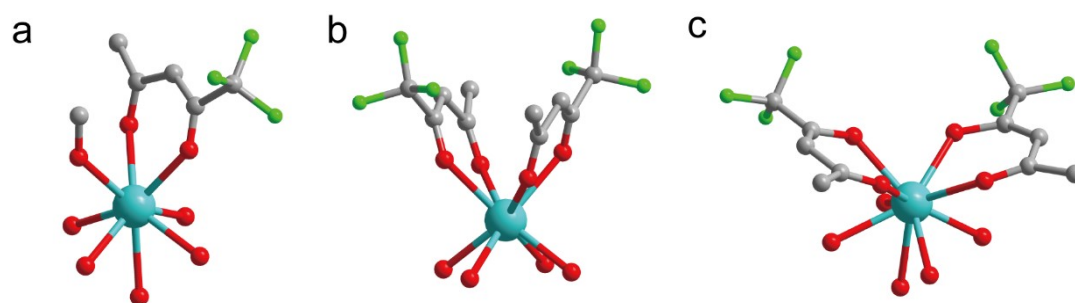

**Figure S1.** The ligands and methanol molecules exhibit three different coordination environments.

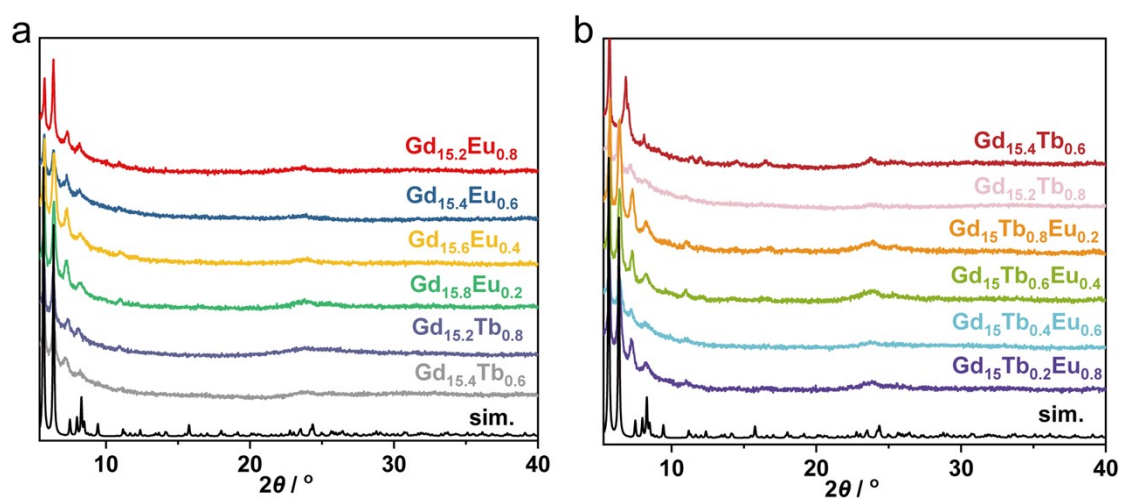

**Figure S2.** PXRD of compound  $\text{Gd}_{16-x}\text{Eu}_x$ ,  $\text{Gd}_{16-x}\text{Tb}_x$  and  $\text{Gd}_{15}\text{Tb}_{1-x}\text{Eu}_x$  ( $x=0.2, 0.4, 0.6, 0.8$ ).

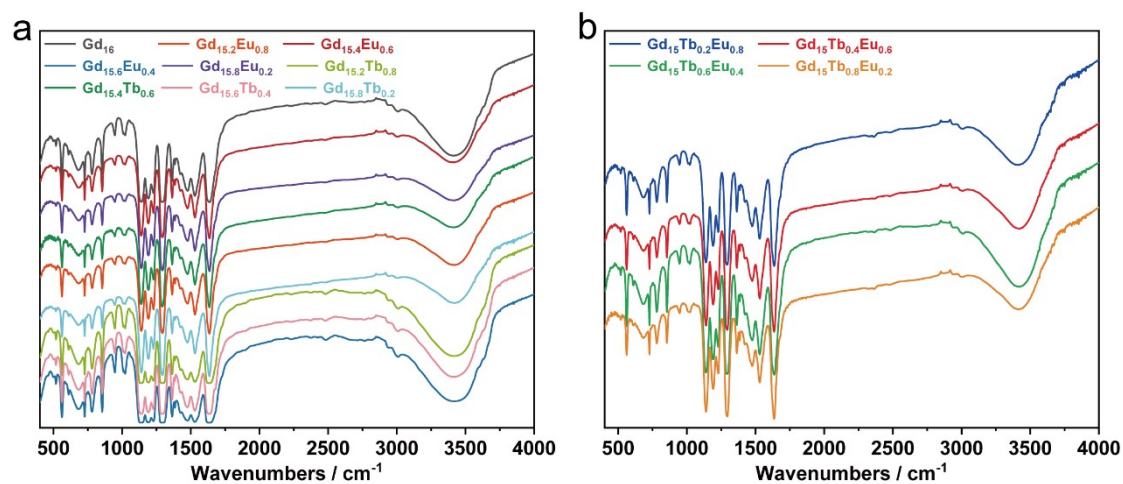

**Figure S3.** Infrared spectrum of PXRD of compound  $Gd_{16-x}Eu_x$ ,  $Gd_{16-x}Tb_x$  and  $Gd_{15}Tb_{1-x}Eu_x$  ( $x=0.2, 0.4, 0.6, 0.8$ ).

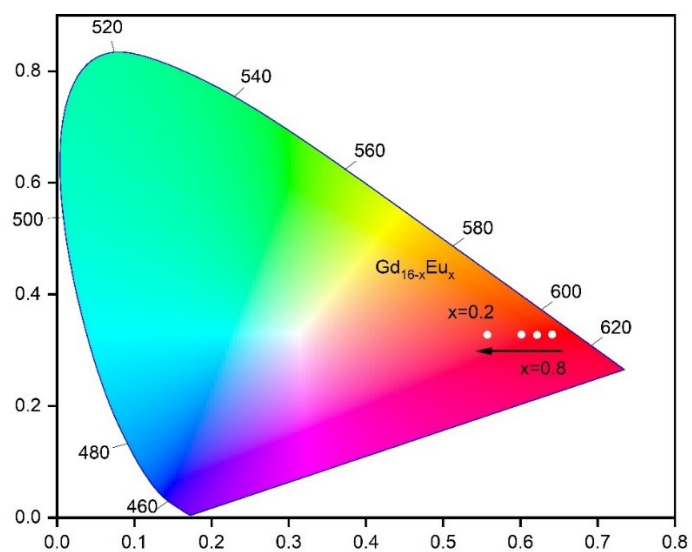

**Figure S4.** CIE chromaticity diagrams of  $Gd_{16-x}Eu_x$  ( $x = 0.2, 0.4, 0.6, 0.8$ ).

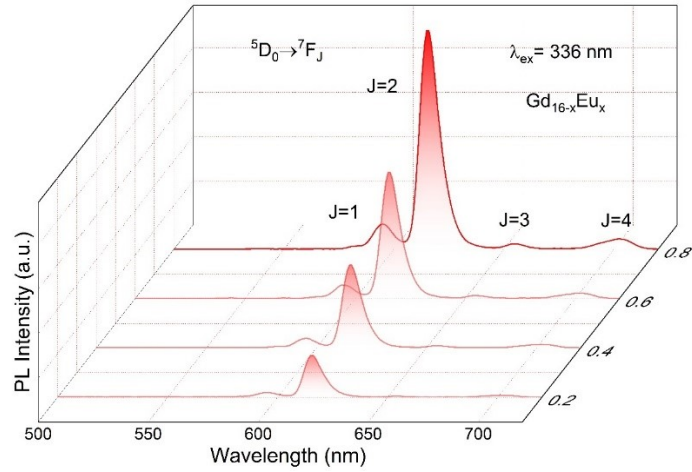

**Figure S5.** Emission spectra of  $Gd_{16}$  doped with europium at different concentrations

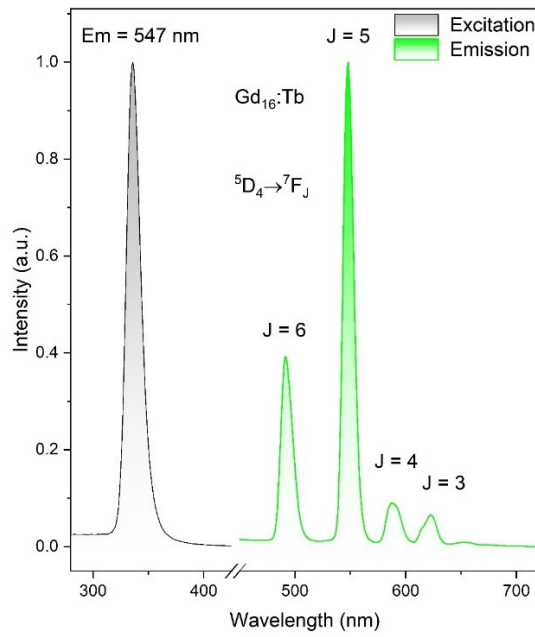

**Figure S6.** Excitation and emission spectra of  $Tb^{3+}$  ion doped  $Gd_{16}$ .

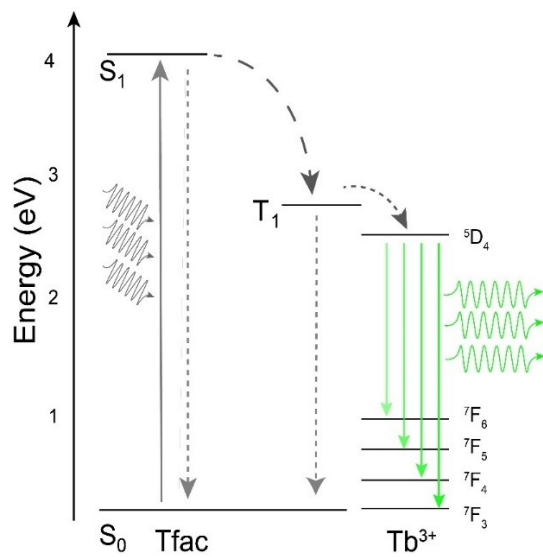

**Figure S7.** Mechanism diagram of luminescence of  $\text{Tb}^{3+}$  ions sensitized by ligands.

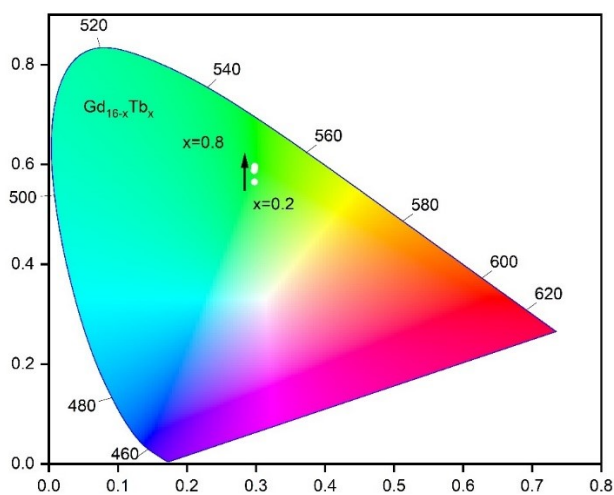

**Figure S8.** CIE chromaticity diagram of  $\text{Gd}_{16-x}\text{Tb}_x$  ( $x = 0.2, 0.4, 0.6, 0.8$ ) clusters.

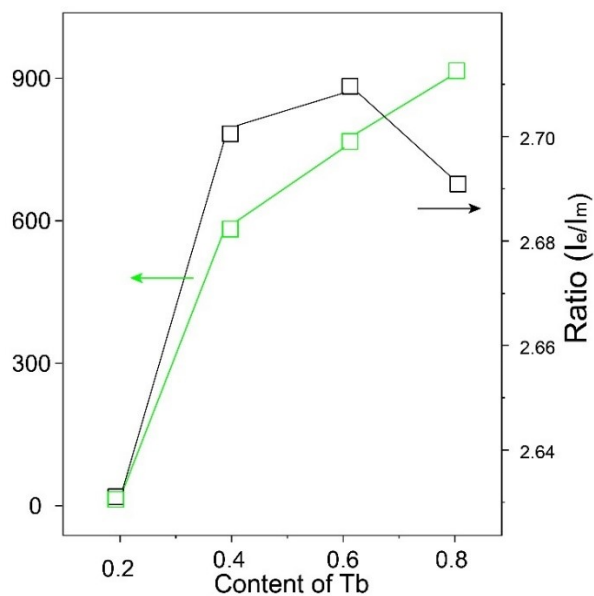

**Figure S9.** Photoluminescence of  $Tb^{3+}$  ion depends on concentration and coordination environment.

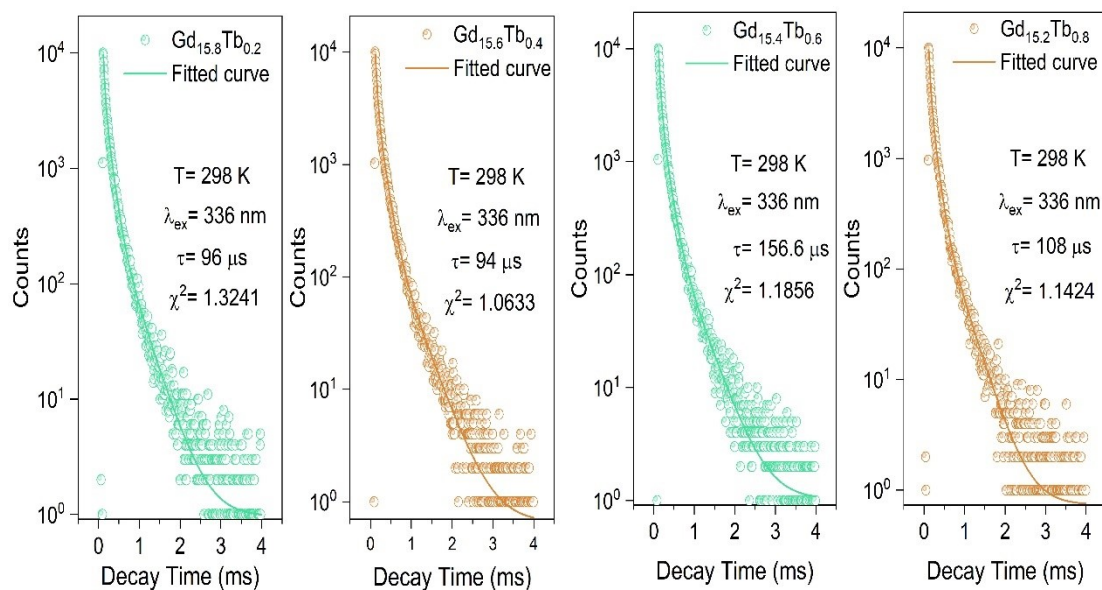

**Figure S10.** Emission decay of  $Tb^{3+}$  ion at 547 nm in  $Gd_{16-x}Tb_x$  ( $x = 0.2, 0.4, 0.6, 0.8$ ) cluster.



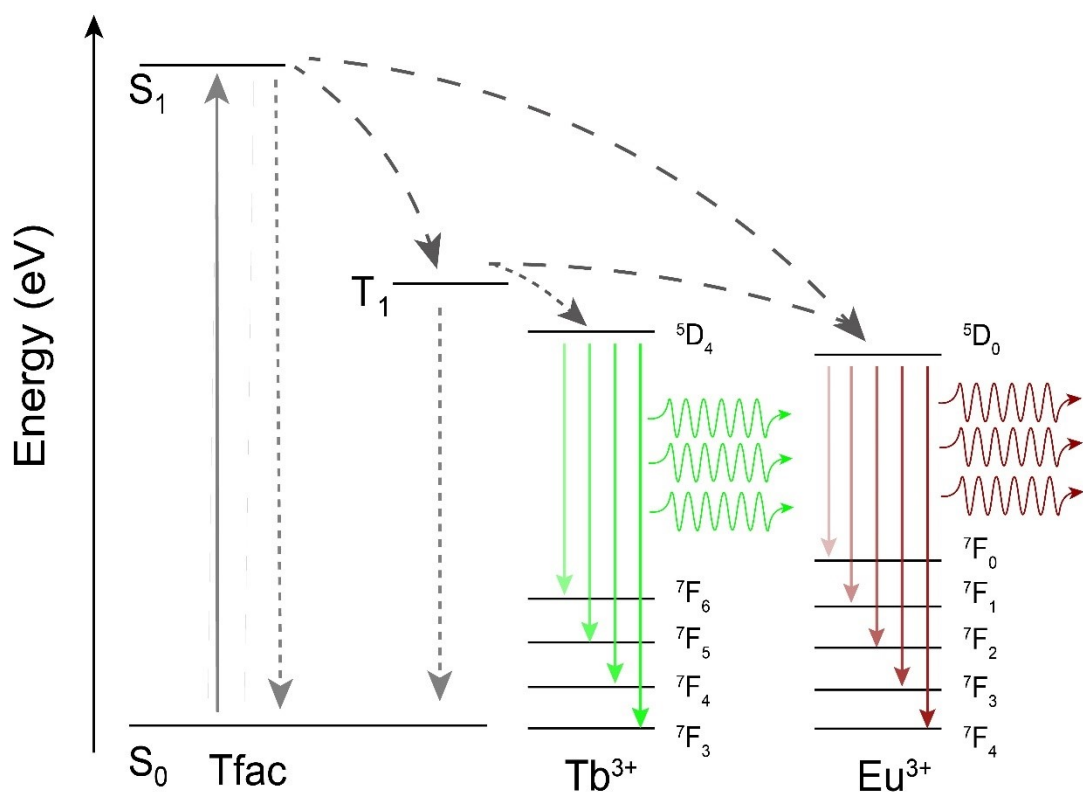

**Figure S11.** Tb<sup>3+</sup> ion to Eu<sup>3+</sup> ion energy transfer excitation diagram.

**Table S1.** ICP data for all samples (What is given in the table is the atomic content ratio in the sample).

| Sample                                               | Theoretical | Experimental |
|------------------------------------------------------|-------------|--------------|
| Gd <sub>15.8</sub> Eu <sub>0.2</sub>                 | 79.0:1      | 79.0:1       |
| Gd <sub>15.6</sub> Eu <sub>0.4</sub>                 | 39.0:1      | 39.0:1       |
| Gd <sub>15.4</sub> Eu <sub>0.6</sub>                 | 26.0:1      | 26.6:1       |
| Gd <sub>15.2</sub> Eu <sub>0.8</sub>                 | 19.0:1      | 20.1:1       |
| Gd <sub>15.8</sub> Tb <sub>0.2</sub>                 | 79.0:1      | 79.0:1       |
| Gd <sub>15.6</sub> Tb <sub>0.4</sub>                 | 39.0:1      | 39.0:1       |
| Gd <sub>15.4</sub> Tb <sub>0.6</sub>                 | 26.0:1      | 26.9:1       |
| Gd <sub>15.2</sub> Tb <sub>0.8</sub>                 | 19.0:1      | 19.4:1       |
| Gd <sub>15</sub> Tb <sub>0.2</sub> Eu <sub>0.8</sub> | 100:1:5     | 100:1:5      |
| Gd <sub>15</sub> Tb <sub>0.4</sub> Eu <sub>0.6</sub> | 100:3:4     | 100:3:3      |
| Gd <sub>15</sub> Tb <sub>0.6</sub> Eu <sub>0.4</sub> | 100:4:3     | 100:3:3      |
| Gd <sub>15</sub> Tb <sub>0.8</sub> Eu <sub>0.2</sub> | 100:5:1     | 100:5:1      |

**Table S2.** Forward ( $W^T$ ) and backward (WT B) IET rates (in  $s^{-1}$ ) for  $Gd_{15.2}Eu_{0.8}$  and  $Gd_{15.4}Eu_{0.6}$ .

| Clusters            | $W^T$                       | WT B                      |
|---------------------|-----------------------------|---------------------------|
| $Gd_{15.2}Eu_{0.8}$ | $3.3233 \times 10^7 s^{-1}$ | $3.23 \times 10^6 s^{-1}$ |
| $Gd_{15.4}Eu_{0.6}$ | $3.0114 \times 10^7 s^{-1}$ | $3.53 \times 10^6 s^{-1}$ |

**Table S3.**  $Gd_{15.4}Eu_{0.6}: S_1$  to  $Eu^{3+}$  IET rates (in  $s^{-1}$ ). The  $\Delta$  is the energy difference (in  $cm^{-1}$ ) between the donor and the acceptor state,  $W$  (%) is the percentual contribution of the pathway,  $W$  is the sum of the dipole-dipole ( $W_{d-d}$ ), the dipole-multipole ( $W_{d-m}$ ), and the exchange ( $W_{ex}$ ) mechanisms.

| Pathway | Transitio<br>n                | $\Delta(cm^{-1})$ | W<br>(%) | W          | $W_{d-d}$  | $W_{d-m}$  | $W_{ex}$   |
|---------|-------------------------------|-------------------|----------|------------|------------|------------|------------|
| 32      | ${}^7F_1 \rightarrow {}^5G_2$ | 2480.0            | 47.93    | $3.52E+06$ | $0.00E+00$ | $0.00E+00$ | $3.52E+06$ |
| 7       | ${}^7F_0 \rightarrow {}^5D_1$ | 9473.0            | 41.19    | $3.02E+06$ | $0.00E+00$ | $0.00E+00$ | $3.02E+06$ |
| 18      | ${}^7F_0 \rightarrow {}^5D_4$ | 914.0             | 5.59     | $4.10E+05$ | $3.32E-05$ | $4.10E+05$ | $0.00E+00$ |
| 28      | ${}^7F_1 \rightarrow {}^5D_2$ | 7389.0            | 2.1      | $1.54E+05$ | $0.00E+00$ | $0.00E+00$ | $1.54E+05$ |
| 26      | ${}^7F_1 \rightarrow {}^5D_0$ | 11579.            | 1.72     | $1.26E+05$ | $0.00E+00$ | $0.00E+00$ | $1.26E+05$ |
|         |                               | 0                 |          |            |            |            |            |

**Table S4.**  $Gd_{15.4}Eu_{0.6}: Eu^{3+}$  to  $S_1$  IET rates (in  $s^{-1}$ ). The  $\Delta$  is the energy difference (in  $cm^{-1}$ ) between the donor and the acceptor state,  $W$  (%) is the percentual contribution of the pathway,  $W$  is the sum of the dipole-dipole ( $W_{d-d}$ ), the dipole-multipole ( $W_{d-m}$ ), and the exchange ( $W_{ex}$ ) mechanisms.

| Pathway | Transitio<br>n                | $\Delta(cm^{-1})$ | W<br>(%) | W          | $W_{d-d}$  | $W_{d-m}$  | $W_{ex}$   |
|---------|-------------------------------|-------------------|----------|------------|------------|------------|------------|
| 18      | ${}^7F_0 \rightarrow {}^5D_4$ | -914.0            | 88.9     | $6.64E+02$ | $5.37E-08$ | $6.64E+02$ | $0.00E+00$ |
| 32      | ${}^7F_1 \rightarrow {}^5G_2$ | -2480.0           | 10.8     | $8.06E+01$ | $0.00E+00$ | $0.00E+00$ | $8.06E+01$ |

**Table S5.**  $Gd_{15.4}Eu_{0.6}: T_1$  to  $Eu^{3+}$  IET rates (in  $s^{-1}$ ). The  $\Delta$  is the energy difference (in  $cm^{-1}$ ) between the donor and the acceptor state,  $W$  (%) is the percentual contribution of

the pathway, W is the sum of the dipole-dipole ( $W_{d-d}$ ), the dipole-multipole ( $W_{d-m}$ ), and the exchange ( $W_{ex}$ ) mechanisms.

| Pathway | Transitio<br>n                | $\Delta(\text{cm}^{-1})$ | W<br>(%) | W        | $W_{d-d}$ | $W_{d-m}$ | $W_{ex}$ |
|---------|-------------------------------|--------------------------|----------|----------|-----------|-----------|----------|
| 7       | ${}^7F_0 \rightarrow {}^5D_1$ | 3773.0                   | 88.01    | 2.65E+07 | 0.00E+00  | 0.00E+00  | 2.65E+07 |
| 26      | ${}^7F_1 \rightarrow {}^5D_0$ | 5879.0                   | 10.38    | 3.13E+06 | 0.00E+00  | 0.00E+00  | 3.13E+06 |
| 28      | ${}^7F_1 \rightarrow {}^5D_2$ | 1689.0                   | 1.61     | 4.84E+05 | 0.00E+00  | 0.00E+00  | 4.84E+05 |

**Table S6.**  $\text{Gd}_{15.4}\text{Eu}_{0.6}$ :  $\text{Eu}^{3+}$  to  $T_1$  IET rates (in  $\text{s}^{-1}$ ). The  $\Delta$  is the energy difference (in  $\text{cm}^{-1}$ ) between the donor and the acceptor state, W (%) is the percentual contribution of the pathway, W is the sum of the dipole-dipole ( $W_{d-d}$ ), the dipole-multipole ( $W_{d-m}$ ), and the exchange ( $W_{ex}$ ) mechanisms.

| Pathway | Transitio<br>n                | $\Delta(\text{cm}^{-1})$ | W<br>(%) | W        | $W_{d-d}$ | $W_{d-m}$ | $W_{ex}$ |
|---------|-------------------------------|--------------------------|----------|----------|-----------|-----------|----------|
| 32      | ${}^7F_1 \rightarrow {}^5G_2$ | 3220.0                   | 99.99    | 3.53E+06 | 0.00E+00  | 0.00E+00  | 3.53E+06 |

**Table S7.**  $\text{Gd}_{15.2}\text{Eu}_{0.8}$ :  $S_1$  to  $\text{Eu}^{3+}$  IET rates (in  $\text{s}^{-1}$ ). The  $\Delta$  is the energy difference (in  $\text{cm}^{-1}$ ) between the donor and the acceptor state, W (%) is the percentual contribution of the pathway, W is the sum of the dipole-dipole ( $W_{d-d}$ ), the dipole-multipole ( $W_{d-m}$ ), and the exchange ( $W_{ex}$ ) mechanisms.

| Pathway | Transitio<br>n                | $\Delta(\text{cm}^{-1})$ | W<br>(%) | W        | $W_{d-d}$ | $W_{d-m}$ | $W_{ex}$ |
|---------|-------------------------------|--------------------------|----------|----------|-----------|-----------|----------|
| 32      | ${}^7F_1 \rightarrow {}^5G_2$ | 2680.0                   | 50.45    | 3.36E+06 | 0.00E+00  | 0.00E+00  | 3.36E+06 |
| 7       | ${}^7F_0 \rightarrow {}^5D_1$ | 9673.0                   | 38.4     | 2.56E+06 | 0.00E+00  | 0.00E+00  | 2056E+06 |
| 18      | ${}^7F_0 \rightarrow {}^5D_4$ | 1114.0                   | 6.05     | 4.03E+05 | 1.88E-05  | 4.03E+05  | 0.00E+00 |
| 28      | ${}^7F_1 \rightarrow {}^5D_2$ | 7589.0                   | 2.03     | 1.36E+05 | 0.00E+00  | 0.00E+00  | 1.36E+05 |
| 26      | ${}^7F_1 \rightarrow {}^5D_0$ | 11779.                   | 1.54     | 1.03E+05 | 0.00E+00  | 0.00E+00  | 1.03E+05 |
|         |                               | 0                        |          |          |           |           |          |

**Table S8.**  $\text{Gd}_{15.2}\text{Eu}_{0.8}$ :  $\text{Eu}^{3+}$  to  $S_1$  IET rates (in  $\text{s}^{-1}$ ). The  $\Delta$  is the energy difference (in  $\text{cm}^{-1}$ ) between the donor and the acceptor state, W (%) is the percentual contribution

of the pathway,  $W$  is the sum of the dipole-dipole ( $W_{d-d}$ ), the dipole-multipole ( $W_{d-m}$ ), and the exchange ( $W_{ex}$ ) mechanisms.

| Pathway | Transitio<br>n                | $\Delta(\text{cm}^{-1})$ | W<br>(%) | W        | $W_{d-d}$ | $W_{d-m}$ | $W_{ex}$ |
|---------|-------------------------------|--------------------------|----------|----------|-----------|-----------|----------|
| 18      | ${}^7F_0 \rightarrow {}^5D_4$ | -1114.0                  | 89.16    | 2.48E+02 | 1.16E-08  | 2.48E+02  | 0.00E+00 |
| 32      | ${}^7F_1 \rightarrow {}^5G_2$ | -2680.0                  | 10.54    | 2.94E+01 | 0.00E+00  | 0.00E+00  | 2.94E+01 |

**Table S9.**  $\text{Gd}_{15.2}\text{Eu}_{0.8}$ :  $T_1$  to  $\text{Eu}^{3+}$  IET rates (in  $\text{s}^{-1}$ ). The  $\Delta$  is the energy difference (in  $\text{cm}^{-1}$ ) between the donor and the acceptor state,  $W$  (%) is the percentual contribution of the pathway,  $W$  is the sum of the dipole-dipole ( $W_{d-d}$ ), the dipole-multipole ( $W_{d-m}$ ), and the exchange ( $W_{ex}$ ) mechanisms.

| Pathway | Transitio<br>n                | $\Delta(\text{cm}^{-1})$ | W<br>(%) | W        | $W_{d-d}$ | $W_{d-m}$ | $W_{ex}$ |
|---------|-------------------------------|--------------------------|----------|----------|-----------|-----------|----------|
| 7       | ${}^7F_0 \rightarrow {}^5D_1$ | 3473.0                   | 87.57    | 2.91E+07 | 0.00E+00  | 0.00E+00  | 2.91E+07 |
| 26      | ${}^7F_1 \rightarrow {}^5D_0$ | 5579.0                   | 10.91    | 3.63E+06 | 0.00E+00  | 0.00E+00  | 3.63E+06 |
| 28      | ${}^7F_1 \rightarrow {}^5D_2$ | 1389.0                   | 1.51     | 5.03E+05 | 0.00E+00  | 0.00E+00  | 5.03E+05 |

**Table S10.**  $\text{Gd}_{15.2}\text{Eu}_{0.8}$ :  $\text{Eu}^{3+}$  to  $T_1$  IET rates (in  $\text{s}^{-1}$ ). The  $\Delta$  is the energy difference (in  $\text{cm}^{-1}$ ) between the donor and the acceptor state,  $W$  (%) is the percentual contribution of the pathway,  $W$  is the sum of the dipole-dipole ( $W_{d-d}$ ), the dipole-multipole ( $W_{d-m}$ ), and the exchange ( $W_{ex}$ ) mechanisms.

| Pathway | Transitio<br>n                | $\Delta(\text{cm}^{-1})$ | W<br>(%) | W        | $W_{d-d}$ | $W_{d-m}$ | $W_{ex}$ |
|---------|-------------------------------|--------------------------|----------|----------|-----------|-----------|----------|
| 32      | ${}^7F_1 \rightarrow {}^5G_2$ | 3520.0                   | 99.93    | 3.23E+06 | 0.00E+00  | 0.00E+00  | 3.23E+06 |

**Table S11.** Experimental and theoretical 4f–4f intensity parameters  $\Omega_\lambda$  ( $10^{-20} \text{ cm}^2$ ) ( $\lambda = 2,4$ ) for  $\text{Gd}_{15.2}\text{Eu}_{0.8}$  and  $\text{Gd}_{15.4}\text{Eu}_{0.6}$ . The FED contributions (to be used in the calculations of the energy transfer rates for the dipole-dipole mechanism) are in parentheses.

| Sample                            | Experimental |            | Theoretical                                     |                                                 |
|-----------------------------------|--------------|------------|-------------------------------------------------|-------------------------------------------------|
|                                   | $\Omega_2$   | $\Omega_4$ | $\Omega_2^{\text{theo}}(\Omega_2^{\text{FED}})$ | $\Omega_4^{\text{theo}}(\Omega_4^{\text{FED}})$ |
| $\text{Gd}_{15.2}\text{Eu}_{0.8}$ | 0.98900      | 1.31900    | 0.989012                                        | 0.000896                                        |

|                                      |         |         |          |          |
|--------------------------------------|---------|---------|----------|----------|
| Gd <sub>15.4</sub> Eu <sub>0.6</sub> | 1.58300 | 2.23200 | 1.583001 | 0.001294 |
|--------------------------------------|---------|---------|----------|----------|

**Table S12.** Doubly reduced matrix elements used in the calculations of the dipole strengths for absorption and emission of Gd<sub>16-x</sub>Eu<sub>x</sub> ( $x = 0.6, 0.8$ ).

| Transition                                                | Element                                | Value  | Transition                                                | Element                                | Value  |
|-----------------------------------------------------------|----------------------------------------|--------|-----------------------------------------------------------|----------------------------------------|--------|
| <sup>5</sup> D <sub>2</sub> ← <sup>7</sup> F <sub>0</sub> | $\langle \psi \  U^2 \  \psi' \rangle$ | 0.0008 | <sup>5</sup> D <sub>0</sub> → <sup>7</sup> F <sub>2</sub> | $\langle \psi \  U^2 \  \psi' \rangle$ | 0.0032 |
| <sup>5</sup> L <sub>6</sub> ← <sup>7</sup> F <sub>1</sub> | $\langle \psi \  U^6 \  \psi' \rangle$ | 0.0090 | <sup>5</sup> D <sub>0</sub> → <sup>7</sup> F <sub>4</sub> | $\langle \psi \  U^4 \  \psi' \rangle$ | 0.0023 |
| <sup>5</sup> L <sub>6</sub> ← <sup>7</sup> F <sub>0</sub> | $\langle \psi \  U^6 \  \psi' \rangle$ | 0.0155 | <sup>5</sup> D <sub>0</sub> → <sup>7</sup> F <sub>6</sub> | $\langle \psi \  U^6 \  \psi' \rangle$ | 0.0002 |
| <sup>5</sup> D <sub>4</sub> ← <sup>7</sup> F <sub>0</sub> | $\langle \psi \  U^4 \  \psi' \rangle$ | 0.0011 |                                                           |                                        |        |

**Table S13.** Fluorescence lifetime and transfer efficiency of Gd<sub>16-x</sub>Tb<sub>x</sub> and Gd<sub>15</sub>Tb<sub>1-x</sub>Eu<sub>x</sub> ( $x = 0.2, 0.4, 0.6, 0.8$ ).

| Cluster                              | Lifetime(μs) | Cluster                                              | Lifetime(μs) | Efficiency |
|--------------------------------------|--------------|------------------------------------------------------|--------------|------------|
| Gd <sub>15.8</sub> Tb <sub>0.2</sub> | 96           | Gd <sub>15</sub> Tb <sub>0.2</sub> Eu <sub>0.8</sub> | 85           | 11.5%      |
| Gd <sub>15.6</sub> Tb <sub>0.4</sub> | 94           | Gd <sub>15</sub> Tb <sub>0.4</sub> Eu <sub>0.6</sub> | 84           | 10.7%      |
| Gd <sub>15.4</sub> Tb <sub>0.6</sub> | 156.6        | Gd <sub>15</sub> Tb <sub>0.6</sub> Eu <sub>0.4</sub> | 146.4        | 7%         |
| Gd <sub>15.2</sub> Tb <sub>0.8</sub> | 108          | Gd <sub>15</sub> Tb <sub>0.8</sub> Eu <sub>0.2</sub> | 103          | 5%         |

**Table S14.** Best-fitting parameters for the thermometric parameter ( $\Delta$ ).

|                | Gd <sub>15</sub> Tb <sub>0.2</sub> Eu <sub>0.8</sub> | Gd <sub>15</sub> Tb <sub>0.8</sub> Eu <sub>0.2</sub> |
|----------------|------------------------------------------------------|------------------------------------------------------|
| A <sub>1</sub> | 0.354                                                | 7.121                                                |
| A <sub>2</sub> | -0.003                                               | 0.182                                                |
| x <sub>0</sub> | 232.540                                              | 233.220                                              |
| R <sup>2</sup> | 0.993                                                | 0.997                                                |

**Table S15** Single Crystal Structure data of Gd<sub>16</sub>.

| Compound                                                          | Gd <sub>16</sub>                                                                   |
|-------------------------------------------------------------------|------------------------------------------------------------------------------------|
| CCDC number                                                       | 2100059                                                                            |
| Formula                                                           | Gd <sub>16</sub> C <sub>108</sub> O <sub>74</sub> F <sub>60</sub> H <sub>136</sub> |
| <i>Mr</i>                                                         | 6274.1                                                                             |
| Crystal system                                                    | monoclinic                                                                         |
| Space group                                                       | <i>C</i> <sub>2</sub> / <i>m</i>                                                   |
| <i>a</i> / Å                                                      | 21.8785(7)                                                                         |
| <i>b</i> / Å                                                      | 23.5682(5)                                                                         |
| <i>c</i> / Å                                                      | 20.7294(6)                                                                         |
| $\alpha$ / °                                                      | 90                                                                                 |
| $\beta$ / °                                                       | 107.857(3)                                                                         |
| $\gamma$ / °                                                      | 90                                                                                 |
| <i>V</i> / Å <sup>3</sup>                                         | 10173.9(5)                                                                         |
| <i>Z</i>                                                          | 2                                                                                  |
| <i>D</i> <sub>c</sub> / g cm <sup>-3</sup>                        | 2.048                                                                              |
| $\mu$ / mm <sup>-1</sup>                                          | 34.248                                                                             |
| Data/params                                                       | 9619/711                                                                           |
| 2 $\theta$ range / °                                              | 7.502-143.324                                                                      |
| Obs reflns                                                        | 28707                                                                              |
| GOOFs                                                             | 1.109                                                                              |
| R <sub>1</sub> [ <i>I</i> > 2 $\sigma$ ( <i>I</i> )] <sup>a</sup> | 0.1060                                                                             |
| wR <sub>2</sub> (All data) <sup>b</sup>                           | 0.2838                                                                             |

## References

1. Y. Zhang, X. Wang, K. Xu, F. Zhai, J. Shu, Y. Tao, J. Wang, L. Jiang, L. Yang, Y. Wang, W. Liu, J. Su, Z. Chai and S. Wang, *J. Am. Chem. Soc.* 2023, **145**, 24, 13161-13168.
2. B. G. Wybourne, *J. Opt. Soc. Am.*, 1965, **55**, 928-935.
3. C. Görller-Walrand and K. Binnemans, *Handb. Phys. Chem. Rare Earths*, 1998, **25**, 101-264.
4. G. F. de Sá, O. L. Malta, C. de Mello Donegá, A. M. Simas, R. L. Longo, P. A. Santa-Cruz and E. F da Silva Jr, *Coord. Chem. Rev.*, 2000, **196**, 165-195.
5. X. Li, X. Shen, M. Lu, J. Wu, Y. Zhong, Z. Wu, W. W. Yu, Y. Gao, J. Hu and J. Zhu, *Angew. Chem.*, 2023, **135**, e202217832.
6. A. N. C. Neto, E. E. S. Teotonio, G. F. de Sá, H. F. Brito, J. Legendziewicz, L. D. Carlos, M. C. F. C. Felinto, P. Gawryszewska, R. T. Moura Jr and R. L. Longo, W. M. Faustino, O. L. Malta, *Handb. Phys. Chem. Rare Earths*, 2019, **56**, 55-162.
7. O. L. Malta, *J. Lumin.*, 1997, **71**, 229-236.
8. O. L. Malta and F. R. G. e Silva, *Spectrochim. Acta, Part A*, 1998, **54**, 1593-1599.
9. R. Longo, F. R. G. e Silva and O. L. Malta, *Chem. Phys. Lett.*, 2000, **328**, 67-74.
10. O. L. Malta, *J. Non-Cryst. Solids*, 2008, **354**, 4770-4776.
11. A. N. C. Neto and R. T. Moura Jr, *Chem. Phys. Lett.*, 2020, **757**, 137884.
12. F. R. G. e Silva and O. L. Malta, *J. Alloys Compd.*, 1997, **250**, 427-430.
13. G. S. Ofelt, *J. Chem. Phys.*, 1963, **38**, 2171-2180.
14. E. Kasprzycka, A. N. C. Neto, V. A. Trush, L. Jerzykiewicz, V. M. Amirkhanov, O. L. Malta, J. Legendziewicz and P. Gawryszewska, *J. Rare Earths*, 2020, **38**, 552-563.
15. E. E. S. Teotonio, H. F. Brito, G. F. de Sá, M. C. F. C. Felinto, R. H. A. Santos, R. M. Fuquen, I. F. Costa, A. R. Kennedy, D. Gilmore and W. M. Faustino, *Polyhedron*, 2012, **38**, 58-67.
